# Supplementary material for: Immunosuppressive Myeloid Cells Induce Nitric Oxide–Dependent DNA Damage and p53 Pathway Activation in CD8+ T Cells
Source: Oxford University Press journal article supplement (doi:10.1158/2326-6066.cir-20-0085), 2021-01-29
Supplement: 23266066cir200085-sup-236519_3_supp_6872915_qnkcvf.docx [file 23266066cir200085-sup-236519_3_supp_6872915_qnkcvf.docx]

| **Mechanism of Suppression** | **MDSC-mediated Molecule** | **Effect on CD8+ T cells** | **References** |
| --- | --- | --- | --- |
| Release of IL-10 | IL-10 | Decreases antigen sensitivity and effector functions | 11 |
| Catabolism of Arginine | Arginase I | Essential to CD8+ T cell activation, substrate for iNOS | 12, 27 |
| Release of reactive nitrogen species | NO | Protein and surface receptor modification | 10, 13, 20, 26 |
| Release of reactive oxygen species | O2-, H2O2, OH, OH- | Blocks NFκB activation | 14, 21-25 |
| Checkpoint inhibition | PD-L1 | Binds PD-1 and inhibits TCR signaling | 15 |
| Proteolysis of L-selectin | ADAM17 | Unable to locate site of tumor | 16 |
| Catabolism of cytisine/cysteine | Cystine transporter xc- | Unable to proliferate in reduced cysteine environment | 17 |
| Activation of TGBβ | ⍺v integrin | Inhibits CD8+ T cell proliferation | 18 |
| Direct killing of CD8+ T cells | Fas-L | Induces cell death through Fas/Fas-L interaction | 19 |
| Reduction in cytotoxic granule production | Indoleamine 2,3-dioxygenase 1 (IDO) | Reduces cytotoxic capacity | 28 |

**Supplementary Table 1. Summary of proposed mechanisms of MDSC-mediated suppression.**
